# Supplementary material for: Pleura Organoid Transplantation Facilitates Visceral Pleural Repair through CD133+ Progenitor Cell-Mediated Regeneration
Source: Research Square preprint supplement (doi:10.21203/rs.3.rs-7519690/v1), 2025-10-31
Supplement: Supplementary file 1 [file 8633d9fbd4c2e8fb7b571e73.docx]

**Supplementary Table 1. Formulation of media for murine/human lung organoids and pleura organoids**

| Components | Murine lung organoid | Murine pleura organoid | Human lung organoid | Human pleura organoid |
| --- | --- | --- | --- | --- |
| Basal medium | advanced DMEM/F-12 | Medium 199 | advanced DMEM/F-12 | Medium 199 |
| GlutaMAX | 2 mM | 2 mM | 2 mM | 2 mM |
| N-acetylcysteine | 1 mM | 1 mM | 1 mM | 1 mM |
| Nicotinamide | - | - | 2 mM | 2 mM |
| B27 supplement | 2% | 2% | 2% | 2% |
| N2 supplement | 2% | 2% | 2% | 2% |
| RSPO1 | 100 ng/mL | 100 ng/mL | 100 ng/mL | 100 ng/mL |
| EGF | 50 ng/mL | 10 ng/mL | 50 ng/mL | 10 ng/mL |
| FGF-10 | 100 ng/mL | 20 ng/mL | 100 ng/mL | 20 ng/mL |
| FGF-7 | 25 ng/mL | - | 50 ng/mL | - |
| Noggin | 100 ng/mL | 100 ng/mL | 100 ng/mL | 100 ng/mL |
| Wnt-3A conditioned medium | 10% | 10% | 10% | 10% |
| Y-27632 | 10 μM | 10 µM | 10 μM | 10 µM |
| A83-01 | - | 2 µM | - | 2 µM |
| Ascorbic acid | - | 50 μg/mL | - | 50 μg/mL |
| Prostaglandin E2 | - | - | 2 µM | 2 µM |
| ITS | - | 1% | - | 1% |
| Dexamethasone | 50 nM | 200 nM | 50 nM | 200 nM |
| 8-bromo-cAMP | 100 μM | - | 100 μM | - |
| Retinoic acid | - | 50 nM | - | 50 nM |
| IBMX | 100 μM | - | 100 μM | - |
